## Nitrous Oxide Impairs the Neutrophil Oxidative Response

Dieter Fröhlich, M.D.,\* Gregor Rothe, M.D.,† Sigrid Wittmann, M.D.,‡ Gerd Schmitz, M.D.,§ Peter Schmid, Ph.D.,|| Kai Taeger, M.D.,# Jonny Hobbahn, M.D.\*\*

**Background:** Nitrous oxide has been shown inconsistently to impair the oxidative function of neutrophils. The choice of the stimulus, receptor agonists, or stimuli acting independent of receptors seems to determine whether nitrous oxide impairs the oxidative functions, suggesting an interference with the cytosolic signaling of neutrophils.

**Methods:** Production of hydrogen peroxide by neutrophils was assessed using flow cytometric analysis. N-formyl-methionyl-leucyl-phenylalanine (FMLP), C5a, dioctanoylglycerol, and phorbol-12-myristate-13-acetate were used as stimuli. In addition, the expression of receptors for FMLP and the cytosolic-free calcium response of cells were measured.

**Results:** Nitrous oxide depresses C5a- or FMLP-induced generation of reactive oxygen derivatives in a concentration-dependent manner. However, the response with direct activation of protein kinase C was unaffected. Further, the number of FMLP receptors and the cytosolic calcium response were unaffected.

Inhibition of the oxidative response was not reversible within the observation period of 4 h.

**Conclusions:** Nitrous oxide inhibited the intracellular signaling of the investigated G-protein-coupled receptors for chemotactic peptides. No interference of nitrous oxide with reduced nicotinamide adenine dinucleotide phosphate oxidase, the oxidative enzyme system of neutrophils, nor with its activation through protein kinase C was detected. (Key words: C5a; N-formyl-methionyl-leucyl-phenylalanine; respiratory burst; second messengers.)

POLYMORPHONUCLEAR neutrophils are a major component of the nonspecific cell-mediated immune response.<sup>1</sup> A crucial mechanism of defense is the generation of reactive oxygen derivatives.

Data on the effects of nitrous oxide (N<sub>2</sub>O) on the motility and microbicidal oxidative activity of neutrophils are controversial. Some authors, using receptor agonists,<sup>2,3</sup> observed the inhibitory effects of N<sub>2</sub>O, whereas others, using intracellularly acting stimuli,<sup>4,5</sup> have not. Presumably, the choice of the stimulus used to activate neutrophils determines whether N<sub>2</sub>O exerts an inhibitory effect. This suggests an interference of N<sub>2</sub>O with neutrophil signal reception or transduction.

To characterize the mechanism of interference, this *in vitro* study investigated the effect of 30% and 70% N<sub>2</sub>O on the generation of reactive oxygen derivatives in human neutrophils with respect to the signaling pathways used. The flow cytometric assay used for this study allows the quantification of the oxidative response to stimulation of multiple neutrophils at the cellular level.<sup>6</sup>

To localize potential sites of the N<sub>2</sub>O interactions, several stimuli were used to initiate neutrophil responses. The bacterial peptide N-formyl-methionyl-leucyl-phenylalanine (FMLP) and a product of the complement cascade, C5a, both potent chemoattractants for neutrophils, were used to induce hydrogen peroxide (H<sub>2</sub>O<sub>2</sub>) generation by neutrophils.<sup>7</sup> Both substances are agonists of specific G-protein-coupled receptors and share the same second messenger pathway (fig.

\* Assistant Professor, Department of Anesthesiology, University of Regensburg.

† Assistant Professor, Department of Clinical Chemistry and Laboratory Medicine, University of Regensburg.

‡ Research Fellow, Department of Anesthesiology, University of Regensburg.

§ Professor, Department of Clinical Chemistry and Laboratory Medicine, University of Regensburg.

|| Staff Scientist, Swiss Federal Laboratories for Materials Testing and Research.

# Professor, Department of Anesthesiology, University of Regensburg.

\*\* Associate Professor, Department of Anesthesiology, University of Regensburg.

Received from the Departments of Anesthesiology and Clinical Chemistry and Laboratory Medicine, University of Regensburg, Regensburg, Germany; and the Swiss Federal Laboratories for Materials Testing and Research, Dübendorf, Switzerland. Submitted for publication August 13, 1997. Accepted for publication January 13, 1998. Supported by the Deutsche Forschungsgemeinschaft (FR1165/1-1). Presented in part at the 1997 annual meeting of the American Society of Anesthesiologists, San Diego, California, October 18-22, 1997.

Address reprint requests to Dr. Fröhlich: Department of Anesthesiology, University of Regensburg, 93042 Regensburg, Germany. Address electronic mail to: dieter.froehlich@klinik.uni-regensburg.de



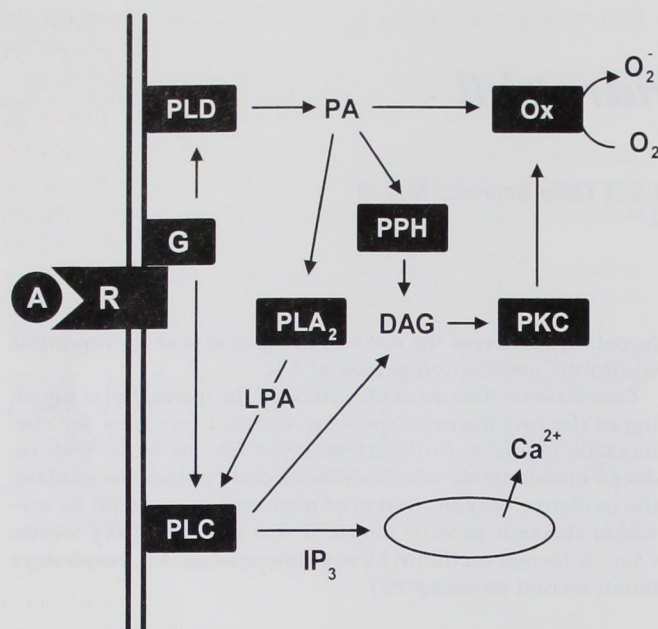

Fig. 1. Signaling pathway of neutrophils linking G-protein-coupled receptors to the enzyme system generating reactive oxygen products. The agonist (A), in this study C5a or FMLP, binds to the specific receptor (R), which transduces the signal via the coupled G protein (G) to phospholipase C (PLC) and phospholipase D (PLD). PLC generates the second messengers, inositol-trisphosphate (IP<sub>3</sub>) and diacylglycerol (DAG), from phosphatidylinositolbisphosphate. IP<sub>3</sub> liberates Ca<sup>2+</sup> from intracellular stores. PLD generates phosphatidic acid (PA). PA activates NADPH-oxidase (Ox). PA is transformed by phosphatidatephosphohydrolase (PPH) to DAG and by phospholipase A<sub>2</sub> (PLA<sub>2</sub>) to lysophosphatidic acid. DAG activates protein kinase C (PKC), leading finally to the initialization of the superoxide anion production by Ox. Lysophosphatidic acid can initiate the generation of IP<sub>3</sub> and DAG by activating PLC.

1). Binding of a fluorescent receptor ligand to FMLP receptors was used to analyze changes in receptor numbers. The increase in cytosolic-free Ca<sup>2+</sup> [Ca<sup>2+</sup>]<sub>i</sub>, after stimulation with FMLP or C5a, was assessed for further analysis of receptor function.<sup>8</sup> Finally, the receptors and parts of the second messenger cascade were bypassed through induction of an oxidative response by membrane-permeable dioctanoylglycerol (DiC8-DAG) and phorbol-13-myristate-12-acetate (PMA).<sup>9,10</sup> Both DiC8-DAG and PMA are synthetic analogs of diacylglycerol (DAG), a compound of the signaling pathway, and induce the oxidative response by direct activation of protein kinase C, an enzyme in the neutrophil signaling chain downstream of receptors and second messengers but upstream of the enzyme system responsible for the generation of reactive oxygen products.<sup>7</sup>

## Materials and Methods

### Leukocyte Preparation

This study was approved by the local ethical board of the University of Regensburg Medical School. After informed consent, venous blood was drawn from healthy donors with no history of infections 2 weeks before the experiments. The mean age of the donors (n = 6) was 32 yr, with a range of 27–38 yr. Average leukocyte counts were 6,300 ± 1,200/μl (mean ± SD), and hemoglobin levels were 15.1 ± 1.3 g/dl. The differential leukocyte counts were as follows: neutrophils, 53 ± 8%; lymphocytes, 32 ± 7%; monocytes, 8 ± 3%; eosinophils, 3 ± 2%; and basophils, 1 ± 1%. The complete blood count and the differential count were determined before each experiment using a Technicon H\*3 counter (Bayer, Tarrytown, NY). No donors had to be excluded because of abnormal blood counts.

Leukocytes were isolated by a sedimentation of erythrocytes on Ficoll-Paque (Pharmacia, Upsalla, Sweden). Heparinized (10 U/ml) whole blood (3 ml) was layered on 3 ml lymphocyte separation medium (Ficoll; density, 1.077 g/ml). Erythrocytes aggregated at the interface and settled at room temperature without centrifugation. After 40 min, the upper 800 μl of the supernatant leukocyte-rich plasma was withdrawn, with care taken to avoid contact with that part of the plasma close to the interface with the separation medium. To avoid artifactual activation of cells, the isolation process did not involve lysis, centrifugation, or washing procedures.

### Intracellular Hydrogen Peroxide Production

Nitrous oxide (Linde, Unterschleißheim, Germany) was tested *in vitro* with neutrophils from each of the six donors. The oxygen content of fresh gas was maintained at 30% in all samples (control, 30 vol%, and 70 vol%). The assay for the intracellular H<sub>2</sub>O<sub>2</sub> production was done in an airtight glovebox with a volume of about 75 l. Fresh gas was prepared using a gas-mixing unit (Draeger, Lübeck, Germany). Fresh gas flow, after equilibration of the atmosphere inside the box using high flow rates, was 5 l/min during the experiments. Inside the glovebox, the samples were kept at 37°C. To keep the amount of evaporated water from the samples as low as possible, the tubes were sealed with gas-permeable parafilm during incubation. Nitrous oxide delivery under the hood was monitored continually using a multigas-analyzer (Capnomac Ultima; Datex, Helsinki, Finland).



## NITROUS OXIDE IMPAIRS NEUTROPHIL OXIDATIVE RESPONSE

Before the propylene-tubes were filled and the leukocytes added, Dulbecco's PBS (Gibco-Life Technologies, Heidelberg, Germany) was equilibrated with  $N_2O$  inside the glovebox by bubbling fresh gas through for 30 min at 37°C. The supernatant leukocyte-rich plasma was suspended 1:50 (20  $\mu$ l leukocytes and 980  $\mu$ l PBS) in pre-equilibrated Dulbecco's PBS and incubated for 20 min at 37°C. The leukocytes were loaded in the presence of  $N_2O$  with the fluorogenic substrates dihydrorhodamine 123 and carboxy-seminaphthorhodafluor-1-acetoxymethylester (SNARF1/AM) for 10 min (both dyes from Molecular Probes, Eugene, OR). The overall exposure time to  $N_2O$  before stimulation was 30 min. The final concentrations were 1  $\mu$ M for dihydrorhodamine 123 and 0.1  $\mu$ M for SNARF1/AM. Next FMLP, C5a, DiC8-DAG, or PMA, respectively, were added to stimulate the  $H_2O_2$  production of neutrophils (all from Sigma Chemical Co., Deisenhofen, Germany). After 15 min of incubation at 37°C, the reaction was stopped on ice. Dead cells were counterstained with propidium iodide (PI; Serva, Heidelberg, Germany) at a final concentration of 30  $\mu$ M. The specimens were stored on ice in complete darkness and measured within 1 h. To evaluate the recovery of neutrophil function, samples of unexposed and exposed cells (70%  $N_2O$ ) were allowed to recover for varying periods of time before initial stimulation: during exposure, 1 h, 2 h, and finally 4 h after the end of exposure.

For analysis, we used a FACScan flow cytometer (Becton Dickinson, San Jose, CA) with argon ion laser excitation at 488 nm, with 10,000 cells of each stained sample measured. Data were acquired and processed using LYSIS-II software. After calibration with standard dye beads (Quantum 26; Flow Cytometry Standards Europe, Leiden, The Netherlands), the results of the cellular fluorescence study were expressed in molecule equivalents of soluble fluorochrome. These units were used for the absolute quantification of cellular fluorescence and allowed interassay and interlaboratory comparison of data. The dead cells were assessed by their lack of esterase activity and their propidium iodide fluorescence ( $>600$  nm). Leukocyte esterase activity was determined based on SNARF1-related orange fluorescence.<sup>6</sup> The SNARF1/AM is cleaved in vital leukocytes by esterases to SNARF1. Neutrophils were identified by their typical side-scatter and forward scatter light patterns as well as their esterase activity. Side scatter depends primarily on the granularity of cells, whereas forward scatter is related to cell size.

#### Expression of Receptors for FMLP

We used the assay established by Allen *et al.*<sup>11</sup> without modification. Briefly, leukocyte-rich plasma suspended in Dulbecco's PBS (1:50) was incubated for 30 min in the presence of  $N_2O$  at 37°C under the same conditions as described for the  $H_2O_2$  assay. Subsequently, the samples were cooled to 4°C to avoid further activation of neutrophils. For staining of FMLP receptors, fluorescein-labeled formyl-Nle-Leu-Phe-Nle-Tyr-Lys was added in a final concentration of 100 nM, incubated for 10 min, and washed twice. Samples were kept in the  $N_2O$  atmosphere during the staining and measuring procedure. Formyl-Nle-Leu-Phe-Nle-Tyr-Lys, a highly specific binding analog of FMLP, emitting light at 520 nm when excited at 488 nm (Molecular Probes). Neutrophils were identified based on side scatter. Nonspecific binding of formyl-Nle-Leu-Phe-Nle-Tyr-Lys was determined by adding excess FMLP ( $10^{-4}$  M) in a parallel set of tubes.

#### Increase in Cytosolic-free Calcium

The increase in  $[Ca^{2+}]_i$  was assessed using flow cytometric analysis combined with the fluorescent calcium indicator fluo-3/acetoxymethylester (fluo3/AM; Molecular Probes).<sup>12</sup> The fluorescence of this 488-nm excitable indicator is enhanced in the presence of  $Ca^{2+}$ . Leukocytes were suspended in  $N_2O$ -equilibrated Dulbecco's PBS containing 2  $\mu$ M fluo-3/AM and incubated for 25 min in the glovebox described previously. Separate samples were prepared for controls and different concentrations of  $N_2O$ . Thereafter, the tubes were sealed with gas-tight tape and immediately connected to the flow cytometer. After 60 s of recording, the stimuli, FMLP (100 nM), or C5a (200 pM) were added, and the measurement was continued for 240 s. Subsequently, ionomycin (2  $\mu$ M) was added. Ionomycin (Calbiochem, Bad Soden, Germany), a calcium ionophore, was used to saturate the intracellular indicator with  $Ca^{2+}$  to standardize the analysis, independent of dye loading. The resulting increased fluorescence was recorded for 1 min.

#### Gas Chromatography and Mass Spectrometry

The volatility of the investigated agent may make the maintenance of stable, reproducible drug concentrations in the fluid phase of the experiment difficult. In a separate set of experiments, concentrations of  $N_2O$  in the fluid and gas phases were analyzed by gas chromatography and high-resolution mass spectrometry, using as gas chromatograph the HRGC Mega 2 (Fisons Instruments SpA, Rodano, Italy). The molecular ion of  $N_2O$



was recorded by single-ion monitoring, using the molecular ion of carbon dioxide as a reference mass; the cycle time was 0.2 s. Quantification was based on signal areas in the mass chromatograms. The gas chromatography and high-resolution mass spectrometry measurements showed that the equilibration with N<sub>2</sub>O of the buffer solution was complete after 5 min with a buffer/gas partition coefficient of 0.423 and a concentration of  $13.4 \pm 1.2$  mM in the fluid with 70% N<sub>2</sub>O at 37°C. The concentrations of N<sub>2</sub>O during experiments were stable. Ten minutes after withdrawal of N<sub>2</sub>O, the concentration decreased to <2% of the initial values.

#### Statistical Analysis

All experimental data are presented as mean values with standard deviations. Lilliefors' test was used to examine normal distribution, Levene's test to check homogeneity of variance, and Student's *t* test to check differences between N<sub>2</sub>O-exposed and control samples assessed in parallel. To test differences between different N<sub>2</sub>O concentrations, analysis of variance and the Tukey B test were computed. Statistical significance was assumed when probability values were <0.05.

## Results

#### Hydrogen Peroxide Production of Neutrophils

The small amounts of intracellular H<sub>2</sub>O<sub>2</sub> generated after stimulation could be assessed by quantifying the intracellular oxidation of the indicator dye dihydrorhodamine 123 to rhodamine 123. The former is a nonfluorescent and membrane-permeable fluorogenic substrate, whereas the latter oxidation product emits a green light (510–530 nm) on excitation. This method has several advantages over those previously used to quantify neutrophil oxidative function. Purification of neutrophils, which often leads to artifactual activation of cells, is unnecessary. Flow cytometric results are not affected by variations in the concentration of neutrophils in the assay because the oxidative response is analyzed on the single-cell level. Flow cytometric analysis revealed a heterogeneous oxidative response after receptor-dependent stimulation with either FMLP (100 nM) or C5a (200 pM). Only approximately one half of all neutrophils produced reactive oxygen products, such as H<sub>2</sub>O<sub>2</sub>, at this degree of stimulation (fig. 2, table 1).

In the presence of N<sub>2</sub>O, the oxidative response to either FMLP or C5a stimulation decreased in a concen-

tration-dependent manner (fig. 3 and table 1). This effect was characterized by a dose-dependent reduction in the number of neutrophils recruited for the oxidative response, in close correlation with a decrease of the total oxidative activity (fig. 3, table 1).

The protein kinase C (PKC) activators, DiC8-DAG and PMA, were used to bypass the receptor and the downstream intracellular signaling. Both substances elicit the H<sub>2</sub>O<sub>2</sub> production through a direct activation of PKC. The reaction of neutrophils in response to both stimuli was homogeneous. DiC8-DAG (7.5 μM) induced a mean oxidative response intensity comparable with that of either FMLP (100 nM) or C5a (200 pM), whereas PMA produced a much higher response. The presence of N<sub>2</sub>O had no effect on the oxidative response after direct activation of PKC with either DiC8-DAG or PMA. The percentage of dead cells was always less than 0.1% independent of drug exposure or stimulation. Less than 5% of neutrophils in control samples displayed a spontaneous oxidative response, indicating a low degree of artifactual activation of neutrophils by the leukocyte preparation and by the assay procedures.

#### Expression of Receptors for FMLP

To exclude changes in receptor number, the FMLP receptors of neutrophils were stained in the presence of N<sub>2</sub>O using a fluorescent ligand. The exposure time of neutrophils to N<sub>2</sub>O for these experiments was similar to that of the H<sub>2</sub>O<sub>2</sub> assays, and N<sub>2</sub>O was present during the staining procedure to exclude potential competition of N<sub>2</sub>O and the fluorescent receptor ligand, formyl-Nle-Leu-Phe-Nle-Tyr-Lys, at the binding site of the FMLP receptor. Under these conditions, N<sub>2</sub>O had no effect on the expression of FMLP receptors on the cell surface. Neutrophils exposed to N<sub>2</sub>O expressed  $39,200 \pm 3,200$  receptors (*n* = 6) for FMLP per cell compared with  $37,500 \pm 3,300$  receptors (*n* = 6) on neutrophils of the control samples, indicating no significant interference of N<sub>2</sub>O with receptor expression.

#### Cytosolic-free Calcium Increase

Early steps of signaling, leading to the induction of the oxidative response, were further analyzed based on the increase of cytosolic-free calcium [Ca<sup>2+</sup>]<sub>i</sub> on stimulation. Both tested receptor agonists, C5a (200 pM) and FMLP (100 nM), induced a similar [Ca<sup>2+</sup>]<sub>i</sub> response (table 2). Cytosolic-free Ca<sup>2+</sup> was maximal after  $30.3 \pm 3.1$  s of stimulation in N<sub>2</sub>O exposed cells and after  $33 \pm 2.7$  s in control neutrophils. The time course of this reaction



## NITROUS OXIDE IMPAIRS NEUTROPHIL OXIDATIVE RESPONSE

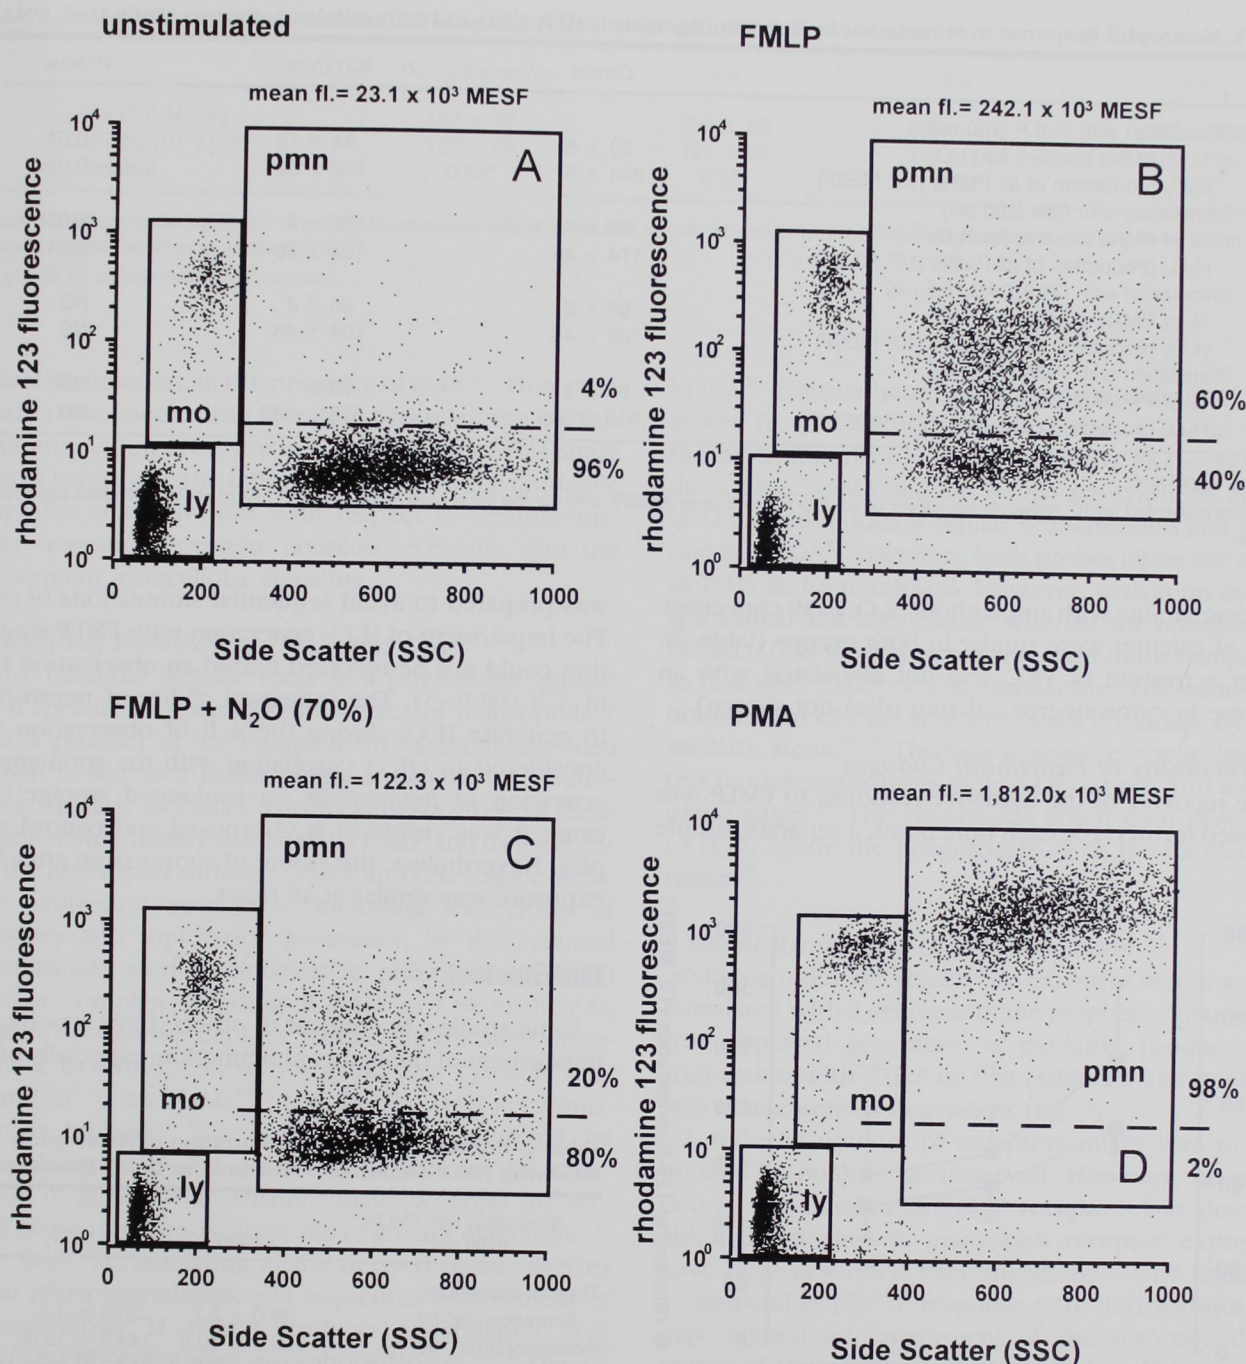

Fig. 2. Flow cytometric analysis of the oxidative burst in 10,000 leukocytes of a single donor using different stimuli in the presence of nitrous oxide ( $N_2O$ ). The y axis represents the hydrogen peroxide ( $H_2O_2$ ) generation (rhodamine-123 fluorescence) in arbitrary units. The x axis indicates the side scatter of leukocytes as a marker of cellular granularity: neutrophils (pmn), monocytes (mo), lymphocytes (ly). (A) Unstimulated leukocytes. Neutrophils in B and C were stimulated with N-formyl-methionyl-leucyl-phenylalanine (FMLP) (100 nM), the latter in the presence of  $N_2O$  (70%). Therefore, B serves as a control for C. The response to FMLP was heterogeneous; only a subset of neutrophils showed a generation of oxidative product (60%). The percentage of nonresponsive cells, as given on the right of each dot plot, was higher in the presence of  $N_2O$  (80%) compared with the control percentage (40%). The reaction of neutrophils after PMA stimulation was homogeneous (D). In conclusion, the fluorescence of reacting neutrophils was not lowered, but the percentage of reacting neutrophils decreased in the presence of  $N_2O$ . This correlated to an overall reduction of the mean fluorescence value as given on top of each dot plot.



**Table 1. Neutrophil Response to Stimulation by Receptor Agonists (FMLP, C5a) and Intracellular Activators (DiC8-DAG, PMA)**

|                                                                             | Control     | N <sub>2</sub> O (70%) | P Value |
|-----------------------------------------------------------------------------|-------------|------------------------|---------|
| Stimulation with FMLP (100 nM)                                              |             |                        |         |
| % of PMNs positive for H <sub>2</sub> O <sub>2</sub>                        | 53 ± 6      | 34 ± 13                | <0.01   |
| H <sub>2</sub> O <sub>2</sub> production of all PMNs (10 <sup>3</sup> MESF) | 244 ± 61    | 142 ± 52               | <0.01   |
| Stimulation with C5a (200 pM)                                               |             |                        |         |
| % of PMNs positive for H <sub>2</sub> O <sub>2</sub>                        | 55 ± 15     | 35 ± 6                 | <0.01   |
| H <sub>2</sub> O <sub>2</sub> production of all PMNs (10 <sup>3</sup> MESF) | 174 ± 46    | 103 ± 26               | <0.01   |
| Stimulation with DiC8-DAG (7.5 μM)                                          |             |                        |         |
| % of PMNs positive for H <sub>2</sub> O <sub>2</sub>                        | 95 ± 2      | 96 ± 4                 | NS      |
| H <sub>2</sub> O <sub>2</sub> production of all PMNs (10 <sup>3</sup> MESF) | 102 ± 46    | 104 ± 48               | NS      |
| Stimulation with PMA (100 nM)                                               |             |                        |         |
| % of PMNs positive for H <sub>2</sub> O <sub>2</sub>                        | 98 ± 1      | 99 ± 1                 | NS      |
| H <sub>2</sub> O <sub>2</sub> production of all PMNs (10 <sup>3</sup> MESF) | 1,613 ± 938 | 1,458 ± 986            | NS      |

NS = not significant.

Values are presented as 10<sup>3</sup> molecule equivalent of soluble fluorochrome (MESF) units for the H<sub>2</sub>O<sub>2</sub> production (mean ± SD of six independent experiments, donors).

was comparable with and without N<sub>2</sub>O. Peak concentrations of calcium were similar in both groups (table 2). Direct activation of PKC was not associated with an increase in cytosolic-free calcium (data not shown).

#### Reversibility of Functional Changes

The recovery of the oxidative response to FMLP was analyzed further. For each time point, a separate sample

was prepared to avoid sequential stimulations of cells. The impairment of H<sub>2</sub>O<sub>2</sub> generation with FMLP stimulation could not be reversed within an observation time of 4 h (table 3). The increased ability of neutrophils to generate H<sub>2</sub>O<sub>2</sub> during the 4 h of observation was considered an effect correlating with the spontaneous activation of neutrophils on prolonged storage<sup>13</sup> because it was visible in N<sub>2</sub>O-exposed and control samples. Nevertheless, the extent of suppression after N<sub>2</sub>O exposure was similar at all times.

#### Discussion

Some studies, in contrast to others, have reported an impairment of the neutrophil function, especially of the

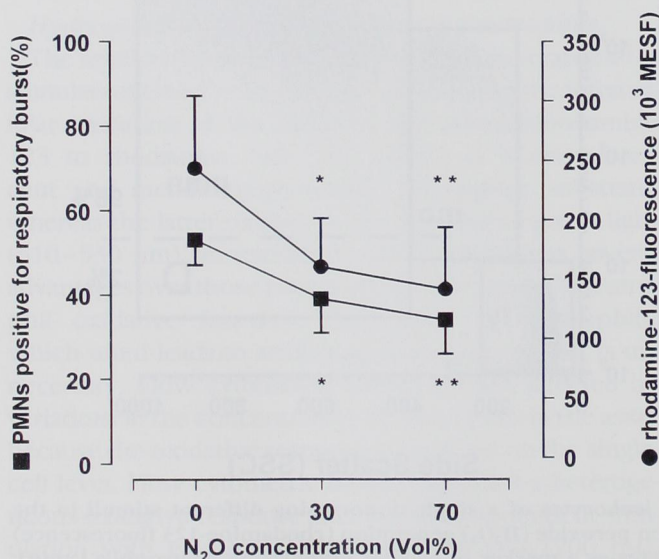

**Fig. 3.** The mean hydrogen peroxide production (●) and the mean percentage of reacting neutrophils (■) in the presence of nitrous oxide (N<sub>2</sub>O) after N-formyl-methionyl-leucyl-phenylalanine stimulation (mean ± SD of six independent experiments (donors)). \**P* < 0.05; \*\**P* < 0.01 for control versus N<sub>2</sub>O exposed.

**Table 2. Intracellular Ca<sup>2+</sup> Concentration of Neutrophils following FMLP Stimulation Measured as fluo-3 Fluorescence**

| Stimulation with FMLP (100 nM)    | Control      | N <sub>2</sub> O (70%) | P Value |
|-----------------------------------|--------------|------------------------|---------|
| Time to maximum fluorescence* (s) | 33.0 ± 2.7   | 30.3 ± 3.1             | NS      |
| Recovery time† (s)                | 150.3 ± 10.6 | 144.9 ± 12.4           | NS      |
| Baseline fluorescence (%)         | 14.1 ± 2.3   | 14.3 ± 1.5             | NS      |
| Maximum fluorescence (%)          | 101.1 ± 9.9  | 103.8 ± 9.5            | NS      |

NS = not significant.

The Ca<sup>2+</sup> dependent fluorescence of fluo-3 loaded cells was standardized relative to the dye loading efficiency based on the ionomycin-induced level of fluorescence (mean ± SD of six independent experiments, donors).

\* Time from addition of FMLP to the maximal Ca<sup>2+</sup> concentration.

† Time until reversal of Ca<sup>2+</sup> concentration to baseline.



## NITROUS OXIDE IMPAIRS NEUTROPHIL OXIDATIVE RESPONSE

**Table 3. Recovery of H<sub>2</sub>O<sub>2</sub> Production following Exposure to N<sub>2</sub>O with FMLP as a Stimulus**

|                                               | During Exposure | 1 h      | 2 h       | 4 h       |
|-----------------------------------------------|-----------------|----------|-----------|-----------|
| Control (10 <sup>3</sup> MESF)                | 197 ± 98        | 222 ± 98 | 337 ± 105 | 302 ± 108 |
| N <sub>2</sub> O (70%) (10 <sup>3</sup> MESF) | 127 ± 89        | 127 ± 47 | 178 ± 89  | 159 ± 86  |
| N <sub>2</sub> O/control                      | 0.64*           | 0.57*    | 0.53*     | 0.53*     |

Values are 10<sup>3</sup> molecule equivalent of soluble fluorochrome (MESF) units and as ratio of control and N<sub>2</sub>O exposed sample assayed in parallel (mean ± SD of six independent experiments, donors).

\*  $P < 0.01$  for control versus N<sub>2</sub>O exposed.

oxidative function, in the presence of N<sub>2</sub>O.<sup>2-5</sup> However, neither the mechanism nor the potential site of this N<sub>2</sub>O interaction are known. The purpose of this study was to investigate the influence of N<sub>2</sub>O on the oxidative response of neutrophils with respect to immunologically relevant, G-protein-coupled receptors, and the subsequent intracellular signaling.

#### Signaling Pathway of FMLP and C5a

The bacterial peptide FMLP is a physiologic agonist for a specific receptor on the surface of neutrophils.<sup>14</sup> C5a, a product of the complement cascade, has been shown to act as a major chemoattractant for neutrophils, similarly to FMLP.<sup>7</sup> Further, phagocytosis of *Escherichia coli* is mainly mediated by FMLP and its receptor on the neutrophil surface.<sup>14</sup> FMLP and C5a trigger multiple neutrophil responses, including exocytosis of enzymes and superoxide generation by the reduced nicotinamide adenine dinucleotide phosphate (NADPH) oxidase complex.<sup>7</sup> Binding of FMLP or C5a to their G-protein-coupled receptors<sup>15</sup> induces a transient elevation of inositol-1,4,5-trisphosphate, free cytosolic calcium [Ca<sup>2+</sup>]<sub>i</sub>, and DAG<sup>10,16</sup> (fig. 1). The DAG accumulation is biphasic: The initial phase is catalyzed by phospholipase C and occurs in parallel to the generation of inositol-1,4,5-trisphosphate, whereas the second phase is more sustained and of greater magnitude.<sup>17</sup> The DAG, accumulating in the delayed phase, derives from phosphatylcholine *via* sequential involvement of phospholipase D, which produces phosphatidic acid (PA) and phosphatidate phosphohydrolase.<sup>18,19</sup> The accumulation of PA and DAG are supposed to mediate sustained cellular responses.<sup>7,20</sup> As shown in reconstitution assays, PA directly activates NADPH oxidase.<sup>21</sup> Phosphatidic acid is also transformed by phospholipase A<sub>2</sub> to lysophosphatidic acid, an activator of phospholipase C.<sup>22</sup> DAG induces a redistribution of the PKC isoforms  $\beta$ I,  $\beta$ II, and  $\zeta$  from cytosol to the plasma mem-

brane.<sup>10</sup> Human neutrophils express four PKC isoenzymes ( $\alpha$ ,  $\beta$ I,  $\beta$ II,  $\zeta$ ). Protein kinase C- $\beta$  and - $\zeta$  are the most abundant isoforms, whereas PKC- $\alpha$  is barely detectable.<sup>23</sup> PMA and DiC8-DAG are synthetic analogs of DAG and induce a similar redistribution and activation of PKC.<sup>9,10</sup> Therefore both probes allow the effects of DAG to be mimicked. However, activation by PMA is maximal and irreversible, whereas the reaction after DiC8-DAG is weaker, reversible, and more comparable to that after FMLP or C5a stimulation. The membrane-bound form of PKC activates NADPH oxidase by intermediate steps.<sup>16,24</sup> Through a single electron transfer, this oxidase transforms molecular oxygen into a superoxide anion.<sup>16</sup> The superoxide anion then dismutates to H<sub>2</sub>O<sub>2</sub> inside the phagosomes or in the extracellular space.<sup>25</sup>

#### Site of the Nitrous Oxide Interaction

Nitrous oxide decreased the oxidative response. This correlated with a decrease in the number of neutrophils that displayed generation of oxidative products with stimulation with FMLP or C5a (table 1). The inhibition was concentration dependent (fig. 3).

A reduced number of receptors might lead to a decreased response,<sup>26</sup> as observed. However, no reduction in the number of FMLP receptors was detected, although changes in neutrophil receptor expression have been described after anesthesia.<sup>27</sup> The finding of a comparable [Ca<sup>2+</sup>]<sub>i</sub> response with and without N<sub>2</sub>O may suggest an impairment of the response downstream of phospholipase C. Nevertheless, N<sub>2</sub>O may have an effect on the G proteins or phospholipase C because the intracellularly released Ca<sup>2+</sup> may not be due solely to inositol-1,4,5-trisphosphate-dependent mechanisms. In this context, an activation of phospholipase C by PA and lysophosphatidic acid<sup>22</sup> or of guanylate cyclase by N<sub>2</sub>O, resulting in increased intracellular cyclic guanosine monophosphate levels, must be consid-



ered potential explanations for the inhibition of the oxidative response. However, the inhibition of the oxidative response, but not of the  $[Ca^{2+}]_i$  response, indicates that  $N_2O$  exerts a postreceptor modulation of signal transduction.

Neither the DiC8-DAG nor the PMA-induced oxidative response was altered in the presence of  $N_2O$ , which indicates an intact signaling downstream of PKC and an unimpaired function of NADPH oxidase in the presence of  $N_2O$ . However, neither PMA nor DiC8-DAG require all of the cofactors that DAG requires to activate PKC, and thus a modulation by  $N_2O$  at the level of PKC activation is not excluded. Saito *et al.*<sup>28</sup> showed an interference of  $N_2O$  with PKC. Nevertheless, it should be noted that the tested PKC was isolated from rat neuronal tips, and thus probably belonged to isoforms differing from those found in human neutrophils. Assuming an intact function of PKC, the decreased oxidative response of neutrophils in the presence of  $N_2O$  might be due to decreased levels of PA or DAG. The former may directly activate NADPH oxidase and has been shown to mediate through its intracellular level the enhanced oxidative response of neutrophils in the presence of proinflammatory cytokines such as tumor necrosis factor- $\alpha$ .<sup>20</sup> The enhanced response in the presence of tumor necrosis factor- $\alpha$  is associated with a changed ratio between nonresponsive and responsive neutrophils, with more of the latter.<sup>6</sup> Nitrous oxide increases the number of nonresponsive neutrophils, perhaps associated with altered second messenger levels. However, experiments including the direct measurement of the involved second messengers PA, lysophosphatidic acid, DAG, and inositol-1,4,5-trisphosphate (fig. 1) would be needed to substantiate these conclusions. In addition, more defined cellular models such as neutrophils in the absence of other potentially interfering leukocytes, or cells from defined cell lines transfected with the investigated chemotactic receptors are required to characterize the mechanism of interaction at the molecular level.

A scavenging of reactive oxygen derivatives by  $N_2O$ , a direct interference with  $H_2O_2$ -generating enzymes, or an inhibition of the oxidation or detection of the dye used are also potential causes for an altered  $H_2O_2$  production or detection. Of importance for such unspecific interactions is the stoichiometric relation among oxygen products,  $N_2O$ , and the dye used. Therefore, the concentrations of 100 nM for FMLP, 200 pM for C5a, and 7.5  $\mu M$  for DiC8-DAG were chosen to achieve the

same level of oxidative response with the different stimuli. These concentrations were also chosen to allow analysis of the heterogeneous response of neutrophils at low degrees of stimulation, and to allow comparison with other authors' data on halogenated volatile anesthetics.<sup>29,30</sup> However, the finding of an unchanged DiC8-DAG- or PMA-induced oxidative response in the presence of  $N_2O$  excludes these possible causes. This is also supported by the observation of an unchanged spontaneous oxidative burst of monocytes in the presence of  $N_2O$  (fig. 2C). The regulation of this monocyte reaction involves signaling pathways that differ from those mediating neutrophil responses.

#### *Irreversibility of the Nitrous Oxide Effect*

A striking result of our study was the irreversibility of the impairment of neutrophil signaling after  $N_2O$  exposure. That this finding is related to our experimental method can be excluded because, as recently published,<sup>30</sup> the effects of halogenated, volatile anesthetics were completely reversible under the same conditions. This suggests an effect unique to  $N_2O$  with a sustained change in the properties of one or more of the involved signaling components. Levin and Blanck<sup>31</sup> reported that halothane and isoflurane irreversibly decrease the ability of calmodulin to bind calcium. Nitrous oxide, which was not addressed in their report, might also be able to alter the properties of calmodulin. This would lead to the findings we observed because the proper functioning of calmodulin is necessary for the initialization of the oxidative response.<sup>32,33</sup> A sustained change in protein properties might also occur in relation to the methionine metabolism. Nitrous oxide affects methionine synthase *in vitro* and *in vivo* by a one-electron oxidation of cobalamin in the enzyme.<sup>34,35</sup> Further, neutrophils have been shown to have a much higher turnover of methionine than other cell types. As much as 25% of the methionine residues are oxidized in unstimulated neutrophils, whereas oxidized methionine is barely detectable in other cell types.<sup>36</sup> Although the oxidation of methionine residues does not always result in complete protein inactivation,<sup>36</sup> it seems possible that neutrophils exposed to  $N_2O$  might be especially susceptible to oxidative damage by a sustained alteration of their methionine metabolism.

#### **Conclusions**

Neutrophils display a decreased oxidative response to FMLP or C5a stimulation in the presence of  $N_2O$ . This



## NITROUS OXIDE IMPAIRS NEUTROPHIL OXIDATIVE RESPONSE

is characterized by a lower percentage of responsive neutrophils and consequently an overall decrease in  $H_2O_2$  production. Nitrous oxide did not affect the number of receptors, nor did it influence the direct induction of the oxidative response by the PKC activators DiC8-DAG and PMA. This suggests an interference of  $N_2O$  upstream of NADPH oxidase. Whether the described effects of  $N_2O$  are relevant for clinical anesthesia is still controversial. However, neutrophils can serve as a good model to study signaling in human cells because the underlying signaling pathways are ubiquitously present in all cells. The further characterization of the  $N_2O$  effects on cellular signal transduction is of interest to help achieve a better understanding of the molecular mechanisms underlying the pharmacologic action of  $N_2O$ .

## References

- McBride WT, Armstrong MA, McBride SJ: Immunomodulation: An important concept in modern anaesthesia. *Anaesthesia* 1996; 51:465-73
- Nunn JF, O'Morain C: Nitrous oxide decreases motility of human neutrophils in vitro. *ANESTHESIOLOGY* 1982; 56:45-8
- Moudgil GC, Gordon J, Forrest JB: Comparative effects of volatile anaesthetic agents and nitrous oxide on human leukocyte migration in vitro. *Can Anaesth Soc J* 1984; 31:631-7
- Welch WD: Effect of enflurane, isoflurane, and nitrous oxide on the microbicidal activity of human polymorphonuclear leukocytes. *ANESTHESIOLOGY* 1984; 61:188-92
- Welch WD, Zaccari J: Effect of halothane and  $N_2O$  on the oxidative activity of human neutrophils. *ANESTHESIOLOGY* 1982; 57:172-6
- Rothe G, Valet G: Flow cytometric assays of oxidative burst activity in phagocytes. *Methods Enzymol* 1994; 233:539-48
- Downey GP, Fukushima T, Filakow L, Waddell TK: Intracellular signaling in neutrophil priming and activation. *Semin Cell Biol* 1995; 6:345-56
- Smith RJ, Justen JM, Bleasdale JE, Sly LM: NPC 15669-modulated human polymorphonuclear neutrophil functional responsiveness: Effects on receptor-coupled signal transduction. *Br J Pharmacol* 1995; 114:1694-702
- Siddiqui RA, English D, Harvey K, Cui Y, Martin MI, Wentland J, Jansen J, Thompson J, Garcia JGN: Phorbol ester-induced priming of neutrophils by phosphatidic acid-stimulated and granule-free neutrophil cytoplasts. *J Leukoc Biol* 1995; 58:189-95
- Dang PM, Rais S, Hakim J, Périani A: Redistribution of protein kinase C isoforms in human neutrophils stimulated by formyl peptides and phorbol myristate acetate. *Biochem Biophys Res Commun* 1995; 212:664-72
- Allen CA, Broom MF, Chadwick VS: Flow cytometry analysis of the expression of neutrophil fMLP receptors. *J Immunol Methods* 1992; 149:159-64
- Elsner J, Kaever V, Emmendorfer A, Breidenbach T, Lohmann-Matthes M-L, Roesler J: Heterogeneity in the mobilization of cytoplasmic calcium by human polymorphonuclear leukocytes in response to fMLP, C5a and IL8/NAP-1. *J Leukoc Biol* 1992; 51:77-83
- Forsyth KD, Levinsky RJ: Preparative procedures of cooling and re-warming increase leukocyte integrin expression and function on neutrophils. *J Immunol Methods* 1990; 128:159-63
- Marasco WA, Phan SH, Kruttsch H, Showell HJ, Feltner DE, Nairn R, Becker EL, Ward PA: Purification and identification of formyl-methionyl-leucyl-phenylalanine as the major peptide neutrophil chemotactic factor produced by *Escherichia coli*. *J Biol Chem* 1984; 259:5430-9
- Tsu RC, Lai HWL, Allen RA, Wong YH: Differential coupling of the formyl peptide receptor to adenylate cyclase and phospholipase C by pertussis toxin-insensitive Gz protein. *Biochem J* 1995; 309:331-9
- McPail LC, Qualliotine-Mann D, Agwu DE, McCall CE: Phospholipases and activation of the NADPH oxidase. *Eur J Haematol* 1993; 51:294-300
- Truett AP, Verghese MW, Dillon SB, Snyderman R: Calcium influx stimulates a second pathway for sustained diacylglycerol production in leukocytes activated by chemoattractants. *Proc Natl Acad Sci U S A* 1988; 85:1549-53
- Mullmann TJ, Cheewatrakoolpong B, Anthes JC, Siegel MI, Egan RW, Billah MM: Phospholipase C and phospholipase D are activated independently of each other in chemotactic peptide-stimulated human neutrophils. *J Leukoc Biol* 1993; 53:630-5
- Billah MM: Phospholipase D and cell signaling. *Curr Opin Immunol* 1993; 5:114-23
- Bauldry SA, Bass DA, Cousart SL, McCall CE: Tumor necrosis factor alpha priming of phospholipase D in human neutrophils. Correlation between phosphatidic acid production and superoxide generation. *J Biol Chem* 1991; 266:4173-9
- Agwu DE, McPhail LC, Sozzani S, Bass DA, McCall CE: Phosphatidic acid as a second messenger in human polymorphonuclear leukocytes. Effects on activation of NADPH oxidase. *J Clin Invest* 1991; 88:531-9
- Jalink K, van Corven EJ, Moolenaar WH: Lysophosphatidic acid, but not phosphatidic acid, is a potent  $Ca^{2+}$ -mobilizing stimulus for fibroblasts. Evidence for an extracellular site of action. *J Biol Chem* 1990; 265:12232-9
- Dang PM, Hakim J, Périani A: Immunochemical identification and translocation of protein kinase C zeta in human neutrophils. *FEBS Lett* 1994; 349:338-42
- Morel F, Doussiere J, Vignais PV: The superoxide-generating oxidase of phagocytic cells. Physiological, molecular and pathological aspects. *Eur J Biochem* 1991; 201:523-46
- Clark RA: The human neutrophil respiratory burst system. *J Infect Dis* 1990; 161:1140-7
- English D, Broxmeyer HE, Gabig TG, Akard LP, Williams DE, Hoffmann R: Temporal adaptation of neutrophil oxidative responsiveness to n-formyl-methionyl-leucyl-phenylalanine. Acceleration by granulocyte-macrophage colony stimulating factor. *J Immunol* 1988; 141:2400-6
- Bardosi L, Bardosi A, Gabius HJ: Changes of expression of endogenous sugar receptors by polymorphonuclear leukocytes after prolonged anaesthesia and surgery. *Can J Anaesth* 1992; 39:143-50
- Saito S, Fujita T, Igarashi M: Effects of inhalational anesthetics on biochemical events in growing neuronal tips. *ANESTHESIOLOGY* 1993; 79:1338-47



29. Nakagawara M, Takeshige K, Takamatsu J, Takahashi S, Yoshitake J, Minakami S: Inhibition of superoxide production and  $\text{Ca}^{2+}$  mobilization in human neutrophils by halothane, enflurane, and isoflurane. *ANESTHESIOLOGY* 1986; 64:4-12
30. Fröhlich D, Rothe G, Schwall B, Schmid P, Schmitz G, Taeger K, Hobbhahn J: Effects of volatile anaesthetics on human neutrophil oxidative response to the bacterial peptide FMLP. *Br J Anaesth* 1997; 78:718-23
31. Levin A, Blanck TJJ: Halothane and isoflurane alter the  $\text{Ca}^{2+}$  binding properties of calmodulin. *ANESTHESIOLOGY* 1995; 83:120-6
32. Périanin A, Pedruzzi E, Hakim J: W-7, a calmodulin antagonist, primes the stimulation of human neutrophil respiratory burst by formyl peptides and platelet-activating factor. *FEBS Lett* 1994; 342:135-8
33. Rao KMK, Padmanabhan J, Kilby DL, Cohen HJ, Currie MS, Weinberg JB: Flow cytometric analysis of nitric oxide production in human neutrophils using dichlorofluorescein diacetate in the presence of calmodulin inhibitor. *J Leukoc Biol* 1992; 51:496-500
34. Frasca V, Stephenson Riazzi B, Matthews RG: In vitro inactivation of methionine synthase by nitrous oxide. *J Biol Chem* 1986; 261:15823-6
35. Christensen B, Guttormsen AB, Schneede J, Riedel B, Refsum H, Svardal A, Ueland PM: Preoperative methionine loading enhances restoration of the cobalamin-dependent enzyme methionine synthase after nitrous oxide anesthesia. *ANESTHESIOLOGY* 1994; 80:1046-56
36. Fliss H, Weissbach H, Brot N: Oxidation of methionine residues in proteins of activated human neutrophils. *Proc Natl Acad Sci U S A* 1983; 80:7160-4
